# Supplementary material
Source: publisher figshare collection journal article supplement (https://karger.figshare.com/ndownloader/files/6873216)
Supplement: Supplementary file 1 [file 6873216]

| **Species** | **Year** | **Reference** |
| --- | --- | --- |
| Mouse | 1997 | [1] |
| Cattle | 1997 | [2,3] |
| Goat | 1998 | [4] |
| Pig | 2000 | [5,6] |
| Mouflon | 2001 | [7] |
| Domestic Cat | 2001 | [8] |
| Rabbit | 2002 | [9] |
| Rat | 2002 | [10] |
| Horse | 2003 | [11] |
| Mule | 2003 | [12] |
| African Wildcat | 2004 | [13] |
| Dog | 2005 | [14] |
| Wolf | 2005 | [15] |
| Ferret | 2006 | [16] |
| Red Deer | 2007 | [17] |
| Buffalo | 2007 | [18] |
| Camel | 2009 | [19] |
| Coyote | 2011 | [20] |

**Table S1. List of successfully cloned animals**

**References**

1 Wakayama T, Perry AC, Zuccotti M, Johnson KR, Yanagimachi R: Full-term development of mice from enucleated oocytes injected with cumulus cell nuclei. Nature 1998;394:369-374.

2 Cibelli JB, Stice SL, Golueke PJ, Kane JJ, Jerry J, Blackwell C, de Leon FAP, Robl JM: Cloned transgenic calves produced from nonquiescent fetal fibroblasts. Science 1998;280:1256-1258.

3 Kato Y, Tani T, Sotomaru Y, Kurokawa K, Kato J-y, Doguchi H, Yasue H, Tsunoda Y: Eight calves cloned from somatic cells of a single adult. Science 1998;282:2095-2098.

4 Baguisi A, Behboodi E, Melican DT, Pollock JS, Destrempes MM, Cammuso C, Williams JL, Nims SD, Porter CA, Midura P: Production of goats by somatic cell nuclear transfer. Nat Biotechnol 1999;17:456-461.

5 Onishi A, Iwamoto M, Akita T, Mikawa S, Takeda K, Awata T, Hanada H, Perry AC: Pig cloning by microinjection of fetal fibroblast nuclei. Science 2000;289:1188-1190.

6 Polejaeva IA, Chen S-H, Vaught TD, Page RL, Mullins J, Ball S, Dai Y, Boone J, Walker S, Ayares DL: Cloned pigs produced by nuclear transfer from adult somatic cells. Nature 2000;407:86-90.

7 Loi P, Ptak G, Barboni B, Fulka J, Cappai P, Clinton M: Genetic rescue of an endangered mammal by cross-species nuclear transfer using post-mortem somatic cells. Nat Biotechnol 2001;19:962-964.

8 Shin T, Kraemer D, Pryor J, Liu L, Rugila J, Howe L, Buck S, Murphy K, Lyons L, Westhusin M: Cell biology: A cat cloned by nuclear transplantation. Nature 2002;415:859-859.

9 Chesné P, Adenot PG, Viglietta C, Baratte M, Boulanger L, Renard J-P: Cloned rabbits produced by nuclear transfer from adult somatic cells. Nat Biotechnol 2002;20:366-369.

10 Zhou Q, Renard J-P, Le Friec G, Brochard V, Beaujean N, Cherifi Y, Fraichard A, Cozzi J: Generation of fertile cloned rats by regulating oocyte activation. Science 2003;302:1179-1179.

11 Galli C, Lagutina I, Crotti G, Colleoni S, Turini P, Ponderato N, Duchi R, Lazzari G: Pregnancy: A cloned horse born to its dam twin. Nature 2003;424:635-635.

12 Woods GL, White KL, Vanderwall DK, Li G-P, Aston KI, Bunch TD, Meerdo LN, Pate BJ: A mule cloned from fetal cells by nuclear transfer. Science 2003;301:1063-1063.

13 Gomez MC, Earle Pope C, Giraldo A, Lyons LA, Harris RF, King AL, Cole A, Godke RA, Dresser BL: Birth of african wildcat cloned kittens born from domestic cats. Cloning Stem Cells 2004;6:247-258.

14 Lee BC, Kim MK, Jang G, Oh HJ, Yuda F, Kim HJ, Shamim MH, Kim JJ, Kang SK, Schatten G: Dogs cloned from adult somatic cells. Nature 2005;436:641-641.

15 Kim MK, Jang G, Oh HJ, Yuda F, Kim HJ, Hwang WS, Hossein MS, Kim JJ, Shin NS, Kang SK: Endangered wolves cloned from adult somatic cells. Cloning Stem Cells 2007;9:130-137.

16 Li Z, Sun X, Chen J, Liu X, Wisely SM, Zhou Q, Renard J-P, Leno GH, Engelhardt JF: Cloned ferrets produced by somatic cell nuclear transfer. Dev Biol 2006;293:439-448.

17 Berg DK, Li C, Asher G, Wells DN, Oback B: Red deer cloned from antler stem cells and their differentiated progeny. Biol Reprod 2007;77:384-394.

18 Shi D, Lu F, Wei Y, Cui K, Yang S, Wei J, Liu Q: Buffalos (bubalus bubalis) cloned by nuclear transfer of somatic cells. Biol Reprod 2007;77:285-291.

19 Wani NA, Wernery U, Hassan F, Wernery R, Skidmore J: Production of the first cloned camel by somatic cell nuclear transfer. Biol Reprod 2010;82:373-379.

20 Hwang I, Jeong YW, Kim JJ, Lee HJ, Kang M, Park KB, Park JH, Kim YW, Kim WT, Shin T: Successful cloning of coyotes through interspecies somatic cell nuclear transfer using domestic dog oocytes. Reprod Fertil Dev 2013;25:1142-1148.
